# Supplementary material
Source: PubMed Central journal article supplement (PMC6607895)
Supplement: NIHMS999346-supplement-Supp_.pdf [file NIHMS999346-supplement-Supp_.pdf]

Supplementary materials accompanying article: Early-life sickness may predispose Siberian hamsters to behavioral changes following alterations of the gut microbiome in adulthood, by Kristyn E. Sylvia, Jessica E. Deyoe, and Gregory E. Demas

**Table 1.** Effects of LPS treatment on the relative abundance of bacterial phyla in female and male adolescent microbiome. No values were significantly different across treatment groups.

| Phylum           | Statistics                   |
|------------------|------------------------------|
| Actinobacteria   | $F_{1,39}=2.479$ , $p=0.267$ |
| Bacteroidetes    | $F_{1,39}=0.471$ , $p=0.497$ |
| Cyanobacteria    | $F_{1,39}=2.304$ , $p=0.267$ |
| Deferribacteres  | $F_{1,39}=3.124$ , $p=0.267$ |
| Elusimicrobia    | $F_{1,39}=2.226$ , $p=0.267$ |
| Euryarchaeota    | $F_{1,39}=1.266$ , $p=0.408$ |
| Firmicutes       | $F_{1,39}=0.738$ , $p=0.429$ |
| Fusobacteria     | $F_{1,39}=1.000$ , $p=0.421$ |
| Proteobacteria   | $F_{1,39}=0.828$ , $p=0.429$ |
| Saccharibacteria | $F_{1,39}=2.845$ , $p=0.267$ |
| Spirochaetae     | $F_{1,39}=1.190$ , $p=0.408$ |
| Tenericutes      | $F_{1,39}=6.979$ , $p=0.155$ |
| Verrucomicrobia  | $F_{1,39}=2.487$ , $p=0.267$ |

**Table 2.** Effects of LPS treatment on the relative abundance of bacterial families in female and male adolescents. An asterisk (\*) indicates statistically significant differences between group means ( $p<0.05$ ).

| Family                        | Statistics                                                 |
|-------------------------------|------------------------------------------------------------|
| Alcaligenaceae                | $F_{1,39}=0.874$ , $p=0.546$                               |
| Anaeroplasmataceae            | $F_{1,39}=1.799$ , $p=0.367$                               |
| Bacteroidaceae                | $F_{1,39}=2.514$ , $p=0.328$                               |
| Bacteroidales RF16 group      | $F_{1,39}=0.438$ , $p=0.667$                               |
| Bacteroidales S24-7 group     | $F_{1,39}=0.395$ , $p=0.675$                               |
| Bifidobacteriaceae            | $F_{1,39}=1.857$ , $p=0.367$                               |
| <b>Brachyspiraceae</b>        | <b><math>F_{1,39}=9.909</math>, <math>p=0.046^*</math></b> |
| Campylobacteraceae            | $F_{1,39}=3.725$ , $p=0.275$                               |
| Christensenellaceae           | $F_{1,39}=1.00$ , $p=0.535$                                |
| Clostridiales vadinBB60 group | $F_{1,39}=0.359$ , $p=0.679$                               |
| Coriobacteriaceae             | $F_{1,39}=0.001$ , $p=0.980$                               |
| Corynebacteriaceae            | $F_{1,39}=4.922$ , $p=0.265$                               |
| Deferribacteraceae            | $F_{1,39}=3.124$ , $p=0.282$                               |
| Desulfovibrionaceae           | $F_{1,39}=0.075$ , $p=0.913$                               |
| Elusimicrobiaceae             | $F_{1,39}=2.226$ , $p=0.344$                               |
| Erysipelotrichaceae           | $F_{1,39}=0.018$ , $p=0.980$                               |
| Eubacteriaceae                | $F_{1,39}=0.003$ , $p=0.980$                               |
| Family XIII                   | $F_{1,39}=2.502$ , $p=0.328$                               |
| Fusobacteriaceae              | $F_{1,39}=1.00$ , $p=0.535$                                |
| Helicobacteraceae             | $F_{1,39}=3.752$ , $p=0.275$                               |
| Lachnospiraceae               | $F_{1,39}=0.462$ , $p=0.667$                               |
| Lactobacillaceae              | $F_{1,39}=2.002$ , $p=0.366$                               |

|                                      |                                                |
|--------------------------------------|------------------------------------------------|
| Methanosarcinaceae                   | $F_{1,39}=1.266, p=0.500$                      |
| Mitochondria                         | $F_{1,39}=3.468, p=0.275$                      |
| Mycoplasmataceae                     | $F_{1,39}=0.501, p=0.667$                      |
| Nitrosomonadaceae                    | $F_{1,39}=1.00, p=0.535$                       |
| <b>Other 1</b>                       | <b><math>F_{1,39}=14.175, p=0.012^*</math></b> |
| Other 2                              | $F_{1,39}=2.845, p=0.307$                      |
| Other 3                              | $F_{1,39}=0.672, p=0.599$                      |
| Oxalobacteraceae                     | $F_{1,39}=0.671, p=0.599$                      |
| Pasteurellaceae                      | $F_{1,39}=3.625, p=0.275$                      |
| Peptococcaceae                       | $F_{1,39}=4.496, p=0.265$                      |
| <b>Porphyromonadaceae</b>            | <b><math>F_{1,39}=16.773, p=0.009^*</math></b> |
| Prevotellaceae                       | $F_{1,39}=0.005, p=0.980$                      |
| Rhodospirillaceae                    | $F_{1,39}=0.156, p=0.831$                      |
| Rickettsiales Incertae Sedis         | $F_{1,39}=0.001, p=0.980$                      |
| Rikenellaceae                        | $F_{1,39}=5.998, p=0.205$                      |
| Ruminococcaceae                      | $F_{1,39}=2.292, p=0.344$                      |
| Spirochaetaceae                      | $F_{1,39}=1.953, p=0.366$                      |
| uncultured Firmicutes bacterium      | $F_{1,39}=0.898, p=0.546$                      |
| uncultured rumen bacterium           | $F_{1,39}=4.381, p=0.265$                      |
| uncultured Verrucomicrobia bacterium | $F_{1,39}=0.038, p=0.958$                      |
| Veillonellaceae                      | $F_{1,39}=3.161, p=0.282$                      |

**Figure 1.** Principle Coordinates Analysis (PCoA) of the microbiome in adult females (black circles) and males (white circles). Gut microbial communities in adult females and males were not significantly different from each other ( $F_{1,143}=-70.557, p=0.974$ ).

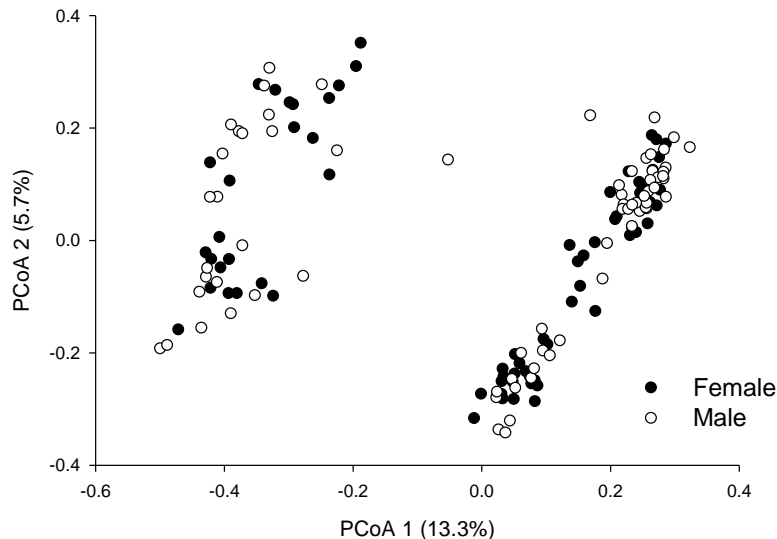

**Figure 2.** Box and whisker plot of Shannon-Wiener diversity across postnatal treatment groups (saline vs. LPS), adult treatment groups (water vs. antibiotics), and time (pre-treatment, treatment, and post-treatment) in female (a) and male (b) hamsters. Boxes represent the median and quartiles; whiskers represent the minimum and maximum. Outliers are represented as single open circles. Shannon diversity was significantly reduced after antibiotic treatment in both females and males when compared to water treatment, and it remained significantly reduced in antibiotic-treated animals after the seven-day recovery period. An asterisk (\*) indicates statistically significant differences between groups ( $p < 0.05$ ).

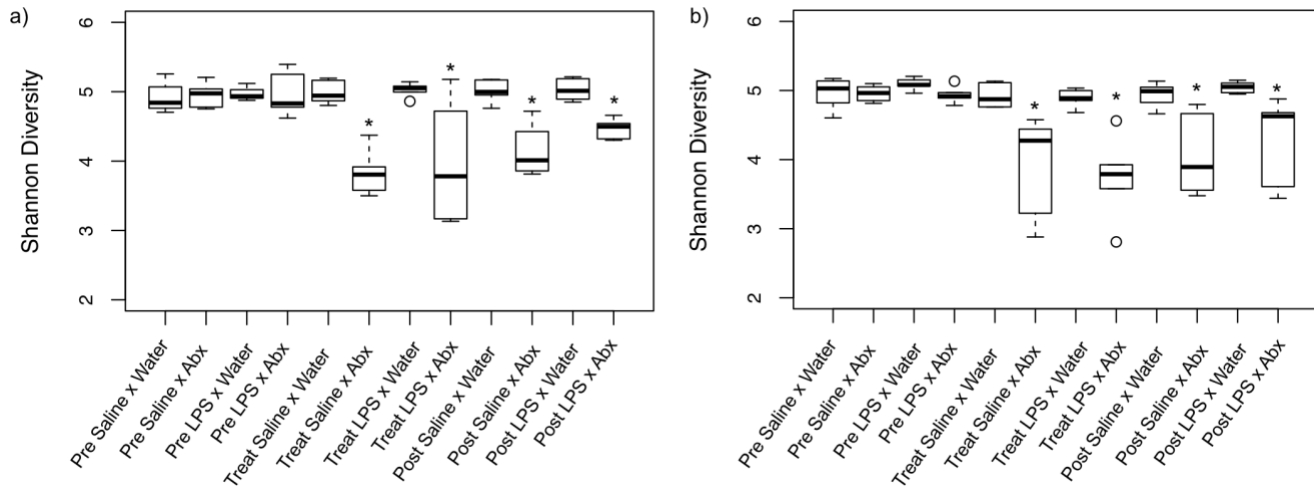

**Table 3.** Effects of adult antibiotic treatment on Bray-Curtis similarity in females.

|             | Pre-Water | Pre-Abx | Treat-Water | Treat-Abx | Post-Water |
|-------------|-----------|---------|-------------|-----------|------------|
| Pre-Abx     | 78.05%    |         |             |           |            |
| Treat-Water | 78.35%    | 75.75%  |             |           |            |
| Treat-Abx   | 47.33%    | 48.70%  | 48.78%      |           |            |
| Post-Water  | 83.45%    | 80.39%  | 82.18%      | 48.35%    |            |
| Post-Abx    | 51.66%    | 52.66%  | 50.29%      | 65.11%    | 51.78%     |

**Table 4.** Effects of adult antibiotic treatment on Bray-Curtis similarity in males.

|             | Pre-Water | Pre-Abx | Treat-Water | Treat-Abx | Post-Water |
|-------------|-----------|---------|-------------|-----------|------------|
| Pre-Abx     | 78.48%    |         |             |           |            |
| Treat-Water | 82.96%    | 76.45%  |             |           |            |
| Treat-Abx   | 40.62%    | 41.04%  | 41.84%      |           |            |
| Post-Water  | 82.41%    | 76.72%  | 82.95%      | 42.14%    |            |
| Post-Abx    | 51.52%    | 50.79%  | 52.50%      | 59.55%    | 52.54%     |

**Table 5.** Effects of adult antibiotic treatment on the relative abundance of bacterial phyla in the female microbiome. An asterisk (\*) indicates statistically significant differences between group means ( $p < 0.05$ ).

| Phyla                | Variable                                          | DF           | F             | p-value       |
|----------------------|---------------------------------------------------|--------------|---------------|---------------|
| Actinobacteria       | Adult Treatment x Timepoint                       | 2, 42        | 2.098         | 0.465         |
| Actinobacteria       | Postnatal Treatment x Timepoint                   | 2, 42        | 1.850         | 0.510         |
| Actinobacteria       | Adult Treatment                                   | 1, 20        | 1.107         | 0.712         |
| Actinobacteria       | Postnatal Treatment x Adult Treatment             | 1, 20        | 0.812         | 0.775         |
| Actinobacteria       | Postnatal Treatment                               | 1, 20        | 0.435         | 0.866         |
| Actinobacteria       | Timepoint                                         | 3, 46        | 0.439         | 0.935         |
| Actinobacteria       | Postnatal Treatment x Adult Treatment x Timepoint | 2, 42        | 0.245         | 0.954         |
| Bacteroidetes        | Postnatal Treatment                               | 1, 59        | 5.390         | 0.245         |
| Bacteroidetes        | Timepoint                                         | 3, 59        | 2.988         | 0.272         |
| Bacteroidetes        | Adult Treatment                                   | 1, 59        | 2.631         | 0.441         |
| Bacteroidetes        | Postnatal Treatment x Adult Treatment             | 1, 59        | 2.027         | 0.497         |
| Bacteroidetes        | Postnatal Treatment x Timepoint                   | 2, 59        | 0.664         | 0.866         |
| Bacteroidetes        | Adult Treatment x Timepoint                       | 2, 59        | 0.428         | 0.894         |
| Bacteroidetes        | Postnatal Treatment x Adult Treatment x Timepoint | 2, 59        | 0.076         | 0.985         |
| <b>Cyanobacteria</b> | <b>Adult Treatment</b>                            | <b>1, 20</b> | <b>20.298</b> | <b>0.009*</b> |
| Cyanobacteria        | Timepoint                                         | 3, 44        | 2.988         | 0.272         |
| Cyanobacteria        | Adult Treatment x Timepoint                       | 2, 40        | 2.440         | 0.421         |
| Cyanobacteria        | Postnatal Treatment x Timepoint                   | 2, 40        | 1.226         | 0.712         |
| Cyanobacteria        | Postnatal Treatment                               | 1, 20        | 0.928         | 0.747         |
| Cyanobacteria        | Postnatal Treatment x Adult Treatment             | 1, 20        | 0.032         | 0.963         |
| Cyanobacteria        | Postnatal Treatment x Adult Treatment x Timepoint | 2, 40        | 0.010         | 0.996         |
| Deferribacteres      | Postnatal Treatment                               | 1, 20        | 3.176         | 0.414         |
| Deferribacteres      | Adult Treatment x Timepoint                       | 2, 41        | 1.449         | 0.659         |
| Deferribacteres      | Postnatal Treatment x Adult Treatment x Timepoint | 2, 41        | 1.256         | 0.712         |
| Deferribacteres      | Adult Treatment                                   | 1, 20        | 0.380         | 0.866         |
| Deferribacteres      | Postnatal Treatment x Adult Treatment             | 1, 20        | 0.205         | 0.894         |
| Deferribacteres      | Postnatal Treatment x Timepoint                   | 2, 41        | 0.016         | 0.996         |
| Deferribacteres      | Timepoint                                         | 3, 45        | 0.022         | 0.996         |
| Elusimicrobia        | Postnatal Treatment x Adult Treatment             | 1, 20        | 2.371         | 0.465         |
| Elusimicrobia        | Postnatal Treatment x Adult Treatment x Timepoint | 2, 40        | 1.733         | 0.550         |
| Elusimicrobia        | Timepoint                                         | 3, 45        | 1.323         | 0.709         |
| Elusimicrobia        | Postnatal Treatment                               | 1, 20        | 0.102         | 0.935         |
| Elusimicrobia        | Postnatal Treatment x Timepoint                   | 2, 40        | 0.280         | 0.935         |
| Elusimicrobia        | Adult Treatment x Timepoint                       | 2, 40        | 0.227         | 0.957         |
| Elusimicrobia        | Adult Treatment                                   | 1, 20        | 0.022         | 0.963         |
| Euryarchaeota        | Adult Treatment                                   | 1, 60        | 5.750         | 0.245         |
| Euryarchaeota        | Postnatal Treatment                               | 1, 60        | 3.415         | 0.344         |
| Euryarchaeota        | Timepoint                                         | 3, 60        | 1.873         | 0.465         |
| Euryarchaeota        | Postnatal Treatment x Timepoint                   | 2, 60        | 0.839         | 0.841         |
| Euryarchaeota        | Postnatal Treatment x Adult Treatment x Timepoint | 2, 60        | 0.581         | 0.866         |
| Euryarchaeota        | Postnatal Treatment x Adult Treatment             | 1, 60        | 0.314         | 0.866         |
| Euryarchaeota        | Adult Treatment x Timepoint                       | 2, 60        | 0.447         | 0.894         |
| Firmicutes           | Postnatal Treatment                               | 1, 59        | 5.223         | 0.245         |
| Firmicutes           | Timepoint                                         | 3, 59        | 2.607         | 0.315         |
| Firmicutes           | Postnatal Treatment x Adult Treatment             | 1, 59        | 2.433         | 0.465         |

|                       |                                                   |              |               |               |
|-----------------------|---------------------------------------------------|--------------|---------------|---------------|
| Firmicutes            | Adult Treatment                                   | 1, 59        | 0.995         | 0.726         |
| Firmicutes            | Postnatal Treatment x Timepoint                   | 2, 59        | 0.785         | 0.841         |
| Firmicutes            | Adult Treatment x Timepoint                       | 2, 59        | 0.312         | 0.935         |
| Firmicutes            | Postnatal Treatment x Adult Treatment x Timepoint | 2, 59        | 0.100         | 0.974         |
| <b>Proteobacteria</b> | <b>Adult Treatment</b>                            | <b>1, 20</b> | <b>32.719</b> | <b>0.001*</b> |
| <b>Proteobacteria</b> | <b>Timepoint</b>                                  | <b>3, 45</b> | <b>6.016</b>  | <b>0.033*</b> |
| Proteobacteria        | Adult Treatment x Timepoint                       | 2, 40        | 3.253         | 0.275         |
| Proteobacteria        | Postnatal Treatment                               | 1, 20        | 3.095         | 0.414         |
| Proteobacteria        | Postnatal Treatment x Adult Treatment             | 1, 20        | 0.261         | 0.894         |
| Proteobacteria        | Postnatal Treatment x Adult Treatment x Timepoint | 2, 40        | 0.177         | 0.963         |
| Proteobacteria        | Postnatal Treatment x Timepoint                   | 2, 40        | 0.128         | 0.963         |
| Saccharibacteria      | Adult Treatment x Timepoint                       | 2, 40        | 5.710         | 0.111         |
| Saccharibacteria      | Timepoint                                         | 3, 42        | 3.400         | 0.245         |
| Saccharibacteria      | Adult Treatment                                   | 1, 20        | 5.060         | 0.272         |
| Saccharibacteria      | Postnatal Treatment x Adult Treatment             | 1, 20        | 0.370         | 0.866         |
| Saccharibacteria      | Postnatal Treatment                               | 1, 20        | 0.323         | 0.866         |
| Saccharibacteria      | Postnatal Treatment x Timepoint                   | 2, 40        | 0.559         | 0.866         |
| Saccharibacteria      | Postnatal Treatment x Adult Treatment x Timepoint | 2, 40        | 0.018         | 0.996         |
| Spirochaetae          | Adult Treatment                                   | 1, 20        | 4.549         | 0.273         |
| Spirochaetae          | Timepoint                                         | 3, 44        | 1.616         | 0.558         |
| Spirochaetae          | Adult Treatment x Timepoint                       | 2, 39        | 0.845         | 0.841         |
| Spirochaetae          | Postnatal Treatment                               | 1, 20        | 0.212         | 0.894         |
| Spirochaetae          | Postnatal Treatment x Adult Treatment x Timepoint | 2, 39        | 0.382         | 0.914         |
| Spirochaetae          | Postnatal Treatment x Timepoint                   | 2, 39        | 0.138         | 0.963         |
| Spirochaetae          | Postnatal Treatment x Adult Treatment             | 1, 20        | 0.000         | 0.996         |
| <b>Tenericutes</b>    | <b>Adult Treatment</b>                            | <b>1, 20</b> | <b>13.515</b> | <b>0.033*</b> |
| Tenericutes           | Adult Treatment x Timepoint                       | 2, 40        | 3.433         | 0.272         |
| Tenericutes           | Postnatal Treatment                               | 1, 20        | 2.390         | 0.465         |
| Tenericutes           | Postnatal Treatment x Adult Treatment x Timepoint | 2, 40        | 1.145         | 0.726         |
| Tenericutes           | Timepoint                                         | 3, 44        | 1.082         | 0.770         |
| Tenericutes           | Postnatal Treatment x Timepoint                   | 2, 40        | 0.804         | 0.841         |
| Tenericutes           | Postnatal Treatment x Adult Treatment             | 1, 20        | 0.050         | 0.963         |
| Verrucomicrobia       | Postnatal Treatment                               | 1, 4         | 1.809         | 0.659         |
| Verrucomicrobia       | Adult Treatment                                   | 1, 4         | 0.719         | 0.841         |
| Verrucomicrobia       | Postnatal Treatment x Adult Treatment x Timepoint | 2, 4         | 0.877         | 0.849         |
| Verrucomicrobia       | Timepoint                                         | 3, 4         | 0.986         | 0.849         |
| Verrucomicrobia       | Postnatal Treatment x Timepoint                   | 2, 4         | 0.463         | 0.894         |
| Verrucomicrobia       | Adult Treatment x Timepoint                       | 2, 4         | 0.303         | 0.935         |
| Verrucomicrobia       | Postnatal Treatment x Adult Treatment             | 1, 4         | 0.032         | 0.963         |

**Table 6.** Effects of adult antibiotic treatment on the relative abundance of bacterial phyla in the male microbiome. An asterisk (\*) indicates statistically significant differences between group means ( $p < 0.05$ ).

| Phylum               | Variable                                          | DF           | F             | p-value       |
|----------------------|---------------------------------------------------|--------------|---------------|---------------|
| Actinobacteria       | Postnatal Treatment                               | 1, 20        | 7.392         | 0.101         |
| Actinobacteria       | Postnatal Treatment x Timepoint                   | 2, 40        | 1.368         | 0.785         |
| Actinobacteria       | Adult Treatment                                   | 1, 20        | 0.913         | 0.796         |
| Actinobacteria       | Postnatal Treatment x Adult Treatment x Timepoint | 2, 40        | 0.823         | 0.845         |
| Actinobacteria       | Timepoint                                         | 2, 40        | 0.232         | 0.962         |
| Actinobacteria       | Adult Treatment x Timepoint                       | 2, 40        | 0.224         | 0.962         |
| Actinobacteria       | Postnatal Treatment x Adult Treatment             | 1, 20        | 0.047         | 0.962         |
| Bacteroidetes        | Postnatal Treatment x Adult Treatment x Timepoint | 2, 40        | 1.710         | 0.775         |
| Bacteroidetes        | Adult Treatment                                   | 1, 20        | 1.224         | 0.785         |
| Bacteroidetes        | Postnatal Treatment x Adult Treatment             | 1, 20        | 0.466         | 0.845         |
| Bacteroidetes        | Adult Treatment x Timepoint                       | 2, 40        | 0.152         | 0.962         |
| Bacteroidetes        | Timepoint                                         | 2, 40        | 0.128         | 0.962         |
| Bacteroidetes        | Postnatal Treatment x Timepoint                   | 2, 40        | 0.110         | 0.962         |
| Bacteroidetes        | Postnatal Treatment                               | 1, 20        | 0.007         | 0.962         |
| <b>Cyanobacteria</b> | <b>Timepoint</b>                                  | <b>2, 40</b> | <b>11.729</b> | <b>0.003*</b> |
| <b>Cyanobacteria</b> | <b>Adult Treatment</b>                            | <b>1, 20</b> | <b>19.325</b> | <b>0.004*</b> |
| Cyanobacteria        | Postnatal Treatment                               | 1, 20        | 5.111         | 0.227         |
| Cyanobacteria        | Adult Treatment x Timepoint                       | 2, 40        | 2.500         | 0.498         |
| Cyanobacteria        | Postnatal Treatment x Adult Treatment             | 1, 20        | 1.466         | 0.785         |
| Cyanobacteria        | Postnatal Treatment x Adult Treatment x Timepoint | 2, 40        | 0.522         | 0.961         |
| Cyanobacteria        | Postnatal Treatment x Timepoint                   | 2, 40        | 0.301         | 0.962         |
| Deferribacteres      | Adult Treatment                                   | 1, 20        | 1.235         | 0.785         |
| Deferribacteres      | Postnatal Treatment x Adult Treatment             | 1, 20        | 1.130         | 0.785         |
| Deferribacteres      | Postnatal Treatment                               | 1, 20        | 0.877         | 0.796         |
| Deferribacteres      | Adult Treatment x Timepoint                       | 2, 40        | 1.047         | 0.796         |
| Deferribacteres      | Timepoint                                         | 2, 40        | 0.931         | 0.821         |
| Deferribacteres      | Postnatal Treatment x Timepoint                   | 2, 40        | 0.868         | 0.836         |
| Deferribacteres      | Postnatal Treatment x Adult Treatment x Timepoint | 2, 40        | 0.754         | 0.845         |
| Elusimicrobia        | Timepoint                                         | 2, 40        | 4.638         | 0.108         |
| Elusimicrobia        | Adult Treatment                                   | 1, 20        | 2.478         | 0.612         |
| Elusimicrobia        | Postnatal Treatment x Timepoint                   | 2, 40        | 0.424         | 0.961         |
| Elusimicrobia        | Postnatal Treatment x Adult Treatment x Timepoint | 2, 40        | 0.409         | 0.961         |
| Elusimicrobia        | Postnatal Treatment                               | 1, 20        | 0.048         | 0.962         |
| Elusimicrobia        | Postnatal Treatment x Adult Treatment             | 1, 20        | 0.034         | 0.962         |
| Elusimicrobia        | Adult Treatment x Timepoint                       | 2, 40        | 0.103         | 0.962         |
| Euryarchaeota        | Adult Treatment x Timepoint                       | 2, 40        | 2.076         | 0.613         |
| Euryarchaeota        | Postnatal Treatment                               | 1, 20        | 1.692         | 0.785         |
| Euryarchaeota        | Adult Treatment                                   | 1, 20        | 1.230         | 0.785         |
| Euryarchaeota        | Postnatal Treatment x Adult Treatment             | 1, 20        | 0.275         | 0.961         |
| Euryarchaeota        | Postnatal Treatment x Adult Treatment x Timepoint | 2, 40        | 0.482         | 0.961         |
| Euryarchaeota        | Timepoint                                         | 2, 40        | 0.397         | 0.961         |
| Euryarchaeota        | Postnatal Treatment x Timepoint                   | 2, 40        | 0.034         | 0.966         |
| Firmicutes           | Postnatal Treatment x Adult Treatment x Timepoint | 2, 40        | 1.799         | 0.750         |

|                         |                                                   |              |               |               |
|-------------------------|---------------------------------------------------|--------------|---------------|---------------|
| Firmicutes              | Adult Treatment                                   | 1, 20        | 0.507         | 0.845         |
| Firmicutes              | Postnatal Treatment x Adult Treatment             | 1, 20        | 0.471         | 0.845         |
| Firmicutes              | Timepoint                                         | 2, 40        | 0.465         | 0.961         |
| Firmicutes              | Adult Treatment x Timepoint                       | 2, 40        | 0.457         | 0.961         |
| Firmicutes              | Postnatal Treatment x Timepoint                   | 2, 40        | 0.113         | 0.962         |
| Firmicutes              | Postnatal Treatment                               | 1, 20        | 0.004         | 0.962         |
| <b>Proteobacteria</b>   | <b>Adult Treatment</b>                            | <b>1, 20</b> | <b>19.775</b> | <b>0.004*</b> |
| <b>Proteobacteria</b>   | <b>Timepoint</b>                                  | <b>2, 40</b> | <b>9.974</b>  | <b>0.004*</b> |
| Proteobacteria          | Adult Treatment x Timepoint                       | 2, 40        | 5.342         | 0.074         |
| Proteobacteria          | Postnatal Treatment x Adult Treatment             | 1, 20        | 0.057         | 0.962         |
| Proteobacteria          | Postnatal Treatment                               | 1, 20        | 0.044         | 0.962         |
| Proteobacteria          | Postnatal Treatment x Adult Treatment x Timepoint | 2, 40        | 0.095         | 0.962         |
| Proteobacteria          | Postnatal Treatment x Timepoint                   | 2, 40        | 0.059         | 0.962         |
| <b>Saccharibacteria</b> | <b>Timepoint</b>                                  | <b>2, 40</b> | <b>16.306</b> | <b>0.003*</b> |
| <b>Saccharibacteria</b> | <b>Adult Treatment x Timepoint</b>                | <b>2, 40</b> | <b>9.299</b>  | <b>0.006*</b> |
| Saccharibacteria        | Adult Treatment                                   | 1, 20        | 2.580         | 0.612         |
| Saccharibacteria        | Postnatal Treatment x Adult Treatment             | 1, 20        | 0.191         | 0.961         |
| Saccharibacteria        | Postnatal Treatment                               | 1, 20        | 0.070         | 0.962         |
| Saccharibacteria        | Postnatal Treatment x Adult Treatment x Timepoint | 2, 40        | 0.175         | 0.962         |
| Saccharibacteria        | Postnatal Treatment x Timepoint                   | 2, 40        | 0.082         | 0.962         |
| Spirochaetae            | Postnatal Treatment x Adult Treatment             | 1, 20        | 1.549         | 0.785         |
| Spirochaetae            | Adult Treatment                                   | 1, 20        | 1.340         | 0.785         |
| Spirochaetae            | Postnatal Treatment x Adult Treatment x Timepoint | 2, 40        | 1.364         | 0.785         |
| Spirochaetae            | Postnatal Treatment                               | 1, 20        | 1.092         | 0.785         |
| Spirochaetae            | Postnatal Treatment x Timepoint                   | 2, 40        | 0.983         | 0.821         |
| Spirochaetae            | Adult Treatment x Timepoint                       | 2, 40        | 0.307         | 0.962         |
| Spirochaetae            | Timepoint                                         | 2, 40        | 0.273         | 0.962         |
| <b>Tenericutes</b>      | <b>Adult Treatment x Timepoint</b>                | <b>2, 40</b> | <b>15.333</b> | <b>0.003*</b> |
| <b>Tenericutes</b>      | <b>Timepoint</b>                                  | <b>2, 40</b> | <b>7.109</b>  | <b>0.024*</b> |
| <b>Tenericutes</b>      | <b>Adult Treatment</b>                            | <b>1, 20</b> | <b>10.025</b> | <b>0.046*</b> |
| Tenericutes             | Postnatal Treatment x Timepoint                   | 2, 40        | 1.091         | 0.796         |
| Tenericutes             | Postnatal Treatment x Adult Treatment             | 1, 20        | 0.925         | 0.796         |
| Tenericutes             | Postnatal Treatment x Adult Treatment x Timepoint | 2, 40        | 0.354         | 0.962         |
| Tenericutes             | Postnatal Treatment                               | 1, 20        | 0.113         | 0.962         |
| Verrucomicrobia         | Timepoint                                         | 2, 40        | 3.219         | 0.303         |
| Verrucomicrobia         | Adult Treatment                                   | 1, 20        | 3.185         | 0.498         |
| Verrucomicrobia         | Postnatal Treatment x Timepoint                   | 2, 40        | 1.224         | 0.785         |
| Verrucomicrobia         | Postnatal Treatment x Adult Treatment x Timepoint | 2, 40        | 0.933         | 0.821         |
| Verrucomicrobia         | Postnatal Treatment                               | 1, 20        | 0.707         | 0.821         |
| Verrucomicrobia         | Adult Treatment x Timepoint                       | 2, 40        | 0.772         | 0.845         |
| Verrucomicrobia         | Postnatal Treatment x Adult Treatment             | 1, 20        | 0.480         | 0.845         |

**Table 7.** Significant effects of treatment on the relative abundance of bacterial families in the female microbiome. All values represent statistically significant differences between group means ( $p < 0.05$ ).

| Family                        | Variable                        | DF     | F      | p-value |
|-------------------------------|---------------------------------|--------|--------|---------|
| Bacteroidaceae                | Adult Treatment                 | 1, 20  | 12.961 | 0.027   |
| Bacteroidales S24-7 group     | Adult Treatment                 | 1, 59  | 17.371 | 0.005   |
| Bacteroidales S24-7 group     | Timepoint                       | 3, 59  | 5.625  | 0.027   |
| Brachyspiraceae               | Adult Treatment                 | 1, 17  | 11.995 | 0.037   |
| Clostridiales vadinBB60 group | Adult Treatment x Timepoint     | 2, 39  | 10.021 | 0.011   |
| Clostridiales vadinBB60 group | Adult Treatment                 | 1, 20  | 15.154 | 0.019   |
| Clostridiales vadinBB60 group | Timepoint                       | 3, 42  | 5.410  | 0.038   |
| Corynebacteriaceae            | Adult Treatment                 | 1, 20  | 15.081 | 0.019   |
| Corynebacteriaceae            | Postnatal Treatment x Timepoint | 2, 39  | 7.765  | 0.023   |
| Desulfovibrionaceae           | Adult Treatment                 | 1, 59  | 18.894 | 0.005   |
| Desulfovibrionaceae           | Timepoint                       | 3, 59  | 6.904  | 0.014   |
| Family XIII                   | Timepoint                       | 3, 55  | 6.613  | 0.017   |
| Family XIII                   | Adult Treatment                 | 1, 17  | 15.292 | 0.021   |
| Helicobacteraceae             | Adult Treatment                 | 1, 20  | 18.634 | 0.011   |
| Helicobacteraceae             | Adult Treatment x Timepoint     | 2, 40  | 7.098  | 0.032   |
| Mycoplasmataceae              | Adult Treatment                 | 1, 20  | 12.115 | 0.032   |
| Other                         | Adult Treatment                 | 1, 20  | 23.926 | 0.005   |
| Oxalobacteraceae              | Adult Treatment                 | 1, 111 | 19.644 | 0.005   |
| Peptococcaceae                | Timepoint                       | 3, 61  | 4.992  | 0.042   |
| Porphyromonadaceae            | Adult Treatment                 | 1, 20  | 24.295 | 0.005   |
| Porphyromonadaceae            | Adult Treatment x Timepoint     | 2, 40  | 8.259  | 0.019   |
| Prevotellaceae                | Adult Treatment                 | 1, 20  | 15.138 | 0.019   |
| Rikenellaceae                 | Adult Treatment x Timepoint     | 2, 39  | 11.845 | 0.005   |
| Rikenellaceae                 | Adult Treatment                 | 1, 20  | 21.202 | 0.008   |
| Ruminococcaceae               | Postnatal Treatment             | 1, 59  | 9.274  | 0.041   |
| uncultured bacterium          | Adult Treatment                 | 1, 20  | 13.903 | 0.023   |
| uncultured rumen bacterium    | Adult Treatment                 | 1, 20  | 16.581 | 0.016   |

**Table 8.** Significant effects of treatment on the relative abundance of bacterial families in the male microbiome. All values represent statistically significant differences between group means ( $p < 0.05$ ).

| Family                        | Variable                    | DF    | F      | p-value |
|-------------------------------|-----------------------------|-------|--------|---------|
| Bacteroidales RF16            | Timepoint                   | 2, 40 | 11.104 | 0.002   |
| Bacteroidales RF16            | Adult Treatment             | 1, 20 | 9.682  | 0.049   |
| Brachyspiraceae               | Adult Treatment x Timepoint | 2, 40 | 10.300 | 0.003   |
| Campylobacteraceae            | Timepoint                   | 2, 40 | 8.480  | 0.010   |
| Clostridiales vadinBB60 group | Adult Treatment             | 1, 20 | 21.126 | 0.003   |
| Clostridiales vadinBB60       | Timepoint                   | 2, 40 | 10.842 | 0.003   |
| Clostridiales vadinBB60       | Adult Treatment x Timepoint | 2, 40 | 10.694 | 0.003   |
| Family XIII                   | Adult Treatment             | 1, 20 | 39.041 | 0.002   |
| Helicobacteraceae             | Timepoint                   | 2, 40 | 14.753 | 0.002   |
| Helicobacteraceae             | Adult Treatment             | 1, 20 | 21.367 | 0.003   |
| Helicobacteraceae             | Adult Treatment x Timepoint | 2, 40 | 8.439  | 0.010   |
| Mycoplasmataceae              | Timepoint                   | 2, 40 | 13.360 | 0.002   |
| Mycoplasmataceae              | Adult Treatment x Timepoint | 2, 40 | 7.786  | 0.015   |
| Mycoplasmataceae              | Adult Treatment             | 1, 20 | 10.884 | 0.033   |
| Other 1                       | Timepoint                   | 2, 40 | 11.512 | 0.002   |



|                            |                             |       |        |       |
|----------------------------|-----------------------------|-------|--------|-------|
| Other 1                    | Adult Treatment x Timepoint | 2, 40 | 7.134  | 0.022 |
| Other 1                    | Adult Treatment             | 1, 20 | 11.162 | 0.031 |
| Oxalobacteraceae           | Adult Treatment             | 1, 20 | 15.307 | 0.010 |
| Peptococcaceae             | Adult Treatment             | 1, 20 | 20.398 | 0.003 |
| Porphyromonadaceae         | Timepoint                   | 2, 40 | 21.441 | 0.002 |
| Porphyromonadaceae         | Adult Treatment x Timepoint | 2, 40 | 16.462 | 0.002 |
| Porphyromonadaceae         | Adult Treatment             | 1, 20 | 20.163 | 0.003 |
| Prevotellaceae             | Timepoint                   | 2, 40 | 16.517 | 0.002 |
| Prevotellaceae             | Adult Treatment x Timepoint | 2, 40 | 11.847 | 0.002 |
| Prevotellaceae             | Adult Treatment             | 1, 20 | 19.800 | 0.003 |
| Rhodospirillaceae          | Timepoint                   | 2, 40 | 16.556 | 0.002 |
| Rikenellaceae              | Timepoint                   | 2, 40 | 21.260 | 0.002 |
| Rikenellaceae              | Adult Treatment x Timepoint | 2, 40 | 7.312  | 0.021 |
| Other 2                    | Adult Treatment             | 1, 20 | 21.794 | 0.002 |
| Other 2                    | Timepoint                   | 2, 40 | 10.216 | 0.004 |
| Uncultured rumen bacterium | Adult Treatment             | 1, 20 | 11.249 | 0.031 |
| Other 3                    | Timepoint                   | 2, 40 | 16.306 | 0.002 |
| Other 3                    | Adult Treatment x Timepoint | 2, 40 | 9.299  | 0.006 |

**Table 9.** Means  $\pm$  SEM of female behavior across treatment groups and time. No values were significantly different from one another ( $p > 0.05$ ). To determine effects of treatment on behavior, we included litter as a random effect.

| Behavior                                | Day 71            |                   |                    |                   | Day 78            |                   |                   |                   | Day 85            |                   |                    |                   |
|-----------------------------------------|-------------------|-------------------|--------------------|-------------------|-------------------|-------------------|-------------------|-------------------|-------------------|-------------------|--------------------|-------------------|
|                                         | Saline x Water    | Saline x Abx      | LPS x Water        | LPS x Abx         | Saline x Water    | Saline x Abx      | LPS x Water       | LPS x Abx         | Saline x Water    | Saline x Abx      | LPS x Water        | LPS x Abx         |
| Duration of anogenital investigation    | 26.33 $\pm$ 4.78  | 20.29 $\pm$ 6.39  | 16.43 $\pm$ 3.68   | 18.62 $\pm$ 6.58  | 18.53 $\pm$ 3.99  | 15.27 $\pm$ 5.31  | 18.00 $\pm$ 5.65  | 11.62 $\pm$ 3.13  | 9.99 $\pm$ 2.90   | 12.41 $\pm$ 4.08  | 14.53 $\pm$ 3.35   | 17.48 $\pm$ 5.13  |
| Frequency of anogenital investigation   | 12.25 $\pm$ 2.84  | 8.56 $\pm$ 2.76   | 8.83 $\pm$ 2.68    | 8.17 $\pm$ 1.97   | 9.75 $\pm$ 1.93   | 9.56 $\pm$ 2.82   | 11.00 $\pm$ 3.26  | 10.67 $\pm$ 2.35  | 7.00 $\pm$ 1.72   | 10.44 $\pm$ 2.87  | 9.50 $\pm$ 1.78    | 11.00 $\pm$ 2.72  |
| Duration of nose-to-nose investigation  | 24.25 $\pm$ 5.71  | 14.17 $\pm$ 3.45  | 17.47 $\pm$ 7.78   | 12.43 $\pm$ 3.11  | 14.79 $\pm$ 3.69  | 17.46 $\pm$ 4.45  | 13.52 $\pm$ 4.66  | 9.78 $\pm$ 1.91   | 12.36 $\pm$ 3.57  | 11.64 $\pm$ 3.76  | 6.13 $\pm$ 4.05    | 6.18 $\pm$ 1.47   |
| Frequency of nose-to-nose investigation | 15.50 $\pm$ 2.15  | 12.11 $\pm$ 2.44  | 13.50 $\pm$ 3.98   | 12.67 $\pm$ 2.08  | 19.38 $\pm$ 2.85  | 18.44 $\pm$ 3.01  | 13.50 $\pm$ 2.39  | 15.33 $\pm$ 2.47  | 17.75 $\pm$ 3.23  | 15.78 $\pm$ 3.09  | 11.50 $\pm$ 5.84   | 11.83 $\pm$ 2.36  |
| Number of Attacks                       | 3.63 $\pm$ 1.39   | 6.00 $\pm$ 2.57   | 3.17 $\pm$ 1.62    | 2.50 $\pm$ 1.15   | 1.38 $\pm$ 0.63   | 2.78 $\pm$ 1.02   | 1.83 $\pm$ 0.91   | 2.50 $\pm$ 0.62   | 1.00 $\pm$ 0.42   | 1.56 $\pm$ 0.56   | 2.67 $\pm$ 0.99    | 1.83 $\pm$ 0.65   |
| Duration of Attacks                     | 3.59 $\pm$ 1.36   | 3.81 $\pm$ 1.37   | 2.20 $\pm$ 1.02    | 1.77 $\pm$ 0.93   | 2.01 $\pm$ 0.84   | 2.26 $\pm$ 0.88   | 1.58 $\pm$ 0.65   | 2.53 $\pm$ 0.71   | 1.51 $\pm$ 0.71   | 1.67 $\pm$ 0.56   | 2.53 $\pm$ 1.26    | 1.75 $\pm$ 0.62   |
| Number of Chases                        | 0.13 $\pm$ 0.13   | 1.11 $\pm$ 0.59   | 0.00 $\pm$ 0.00    | 0.17 $\pm$ 0.17   | 0.25 $\pm$ 0.25   | 0.67 $\pm$ 0.44   | 0.00 $\pm$ 0.00   | 0.17 $\pm$ 0.17   | 0.00 $\pm$ 0.00   | 0.11 $\pm$ 0.11   | 0.17 $\pm$ 0.17    | 0.00 $\pm$ 0.00   |
| Duration of Chases                      | 0.05 $\pm$ 0.05   | 0.79 $\pm$ 0.42   | 0.00 $\pm$ 0.00    | 0.08 $\pm$ 0.08   | 0.19 $\pm$ 0.19   | 0.41 $\pm$ 0.31   | 0.00 $\pm$ 0.00   | 0.10 $\pm$ 0.10   | 0.00 $\pm$ 0.00   | 0.10 $\pm$ 0.10   | 0.08 $\pm$ 0.08    | 0.00 $\pm$ 0.00   |
| Latency to First Attack                 | 79.13 $\pm$ 35.93 | 62.11 $\pm$ 19.38 | 121.33 $\pm$ 43.23 | 99.33 $\pm$ 28.55 | 53.50 $\pm$ 23.95 | 46.56 $\pm$ 25.40 | 31.67 $\pm$ 11.59 | 82.83 $\pm$ 24.91 | 32.63 $\pm$ 16.34 | 61.89 $\pm$ 27.38 | 112.17 $\pm$ 37.96 | 57.50 $\pm$ 31.23 |
| Duration of Grooming                    | 13.71 $\pm$ 4.82  | 13.89 $\pm$ 3.08  | 8.90 $\pm$ 2.15    | 14.22 $\pm$ 6.82  | 7.85 $\pm$ 2.48   | 16.67 $\pm$ 5.17  | 10.57 $\pm$ 3.77  | 11.30 $\pm$ 6.25  | 6.65 $\pm$ 2.78   | 11.20 $\pm$ 4.01  | 4.60 $\pm$ 2.11    | 7.62 $\pm$ 2.97   |
| Frequency of Grooming                   | 7.63 $\pm$ 2.37   | 6.22 $\pm$ 1.14   | 5.17 $\pm$ 1.05    | 8.17 $\pm$ 2.36   | 4.50 $\pm$ 1.57   | 7.33 $\pm$ 1.71   | 6.17 $\pm$ 2.14   | 5.00 $\pm$ 1.69   | 3.38 $\pm$ 0.82   | 4.33 $\pm$ 1.17   | 2.67 $\pm$ 1.31    | 5.33 $\pm$ 1.26   |

**Table 10.** Means  $\pm$  SEM of male behavior across treatment groups and time. An asterisk (\*) indicates statistically significant effect of treatment with the random effect of litter included ( $p < 0.05$ ).

| Behavior                                | Day 71            |                   |                    |                   | Day 78            |                                    |                   |                                     | Day 85             |                                    |                   |                                    |
|-----------------------------------------|-------------------|-------------------|--------------------|-------------------|-------------------|------------------------------------|-------------------|-------------------------------------|--------------------|------------------------------------|-------------------|------------------------------------|
|                                         | Saline x Water    | Saline x Abx      | LPS x Water        | LPS x Abx         | Saline x Water    | Saline x Abx                       | LPS x Water       | LPS x Abx                           | Saline x Water     | Saline x Abx                       | LPS x Water       | LPS x Abx                          |
| Duration of anogenital investigation    | 22.79 $\pm$ 6.03  | 18.29 $\pm$ 5.48  | 19.26 $\pm$ 10.65  | 14.11 $\pm$ 4.12  | 13.27 $\pm$ 6.19  | 8.13 $\pm$ 3.86                    | 15.83 $\pm$ 8.07  | 9.86 $\pm$ 4.22                     | 12.46 $\pm$ 4.05   | 10.79 $\pm$ 4.48                   | 16.44 $\pm$ 10.91 | 13.70 $\pm$ 4.09                   |
| Frequency of anogenital investigation   | 9.86 $\pm$ 2.43   | 7.71 $\pm$ 2.01   | 7.00 $\pm$ 2.69    | 7.38 $\pm$ 1.57   | 9.14 $\pm$ 4.06   | 5.14 $\pm$ 2.25                    | 11.29 $\pm$ 5.19  | 7.25 $\pm$ 2.84                     | 10.71 $\pm$ 2.83   | 8.29 $\pm$ 3.16                    | 9.14 $\pm$ 4.76   | 12.00 $\pm$ 3.69                   |
| Duration of nose-to-nose investigation  | 39.01 $\pm$ 14.94 | 31.14 $\pm$ 13.52 | 12.49 $\pm$ 5.29   | 30.51 $\pm$ 7.04  | 14.49 $\pm$ 4.37  | <b>*8.90 <math>\pm</math> 4.65</b> | 12.16 $\pm$ 6.21  | <b>*12.45 <math>\pm</math> 3.67</b> | 25.04 $\pm$ 11.78  | <b>*6.56 <math>\pm</math> 2.75</b> | 6.83 $\pm$ 3.11   | <b>*9.83 <math>\pm</math> 2.23</b> |
| Frequency of nose-to-nose investigation | 21.57 $\pm$ 5.81  | 15.14 $\pm$ 6.32  | 8.43 $\pm$ 1.67    | 16.50 $\pm$ 3.15  | 18.00 $\pm$ 4.13  | 10.29 $\pm$ 5.53                   | 12.43 $\pm$ 4.53  | 14.13 $\pm$ 3.44                    | 23.14 $\pm$ 8.10   | 11.43 $\pm$ 4.13                   | 12.71 $\pm$ 4.57  | 15.50 $\pm$ 3.18                   |
| Number of Attacks                       | 6.29 $\pm$ 1.71   | 13.29 $\pm$ 3.08  | 8.71 $\pm$ 2.91    | 5.50 $\pm$ 1.40   | 2.86 $\pm$ 0.80   | 9.00 $\pm$ 3.45                    | 3.71 $\pm$ 0.92   | 4.50 $\pm$ 2.31                     | 2.29 $\pm$ 0.68    | 6.43 $\pm$ 1.34                    | 4.86 $\pm$ 1.45   | 4.00 $\pm$ 1.04                    |
| Duration of Attacks                     | 9.77 $\pm$ 3.61   | 24.29 $\pm$ 9.75  | 17.97 $\pm$ 7.88   | 14.65 $\pm$ 4.47  | 3.41 $\pm$ 1.36   | 16.96 $\pm$ 11.44                  | 4.33 $\pm$ 1.39   | 6.51 $\pm$ 3.22                     | 2.11 $\pm$ 0.83    | 8.30 $\pm$ 3.11                    | 5.30 $\pm$ 1.94   | 4.64 $\pm$ 1.26                    |
| Number of Chases                        | 0.14 $\pm$ 0.14   | 4.14 $\pm$ 2.55   | 0.71 $\pm$ 0.47    | 0.38 $\pm$ 0.26   | 0.00 $\pm$ 0.00   | 0.86 $\pm$ 0.55                    | 0.00 $\pm$ 0.00   | 0.75 $\pm$ 0.75                     | 0.00 $\pm$ 0.00    | 0.57 $\pm$ 0.57                    | 0.00 $\pm$ 0.00   | 0.25 $\pm$ 0.25                    |
| Duration of Chases                      | 0.07 $\pm$ 0.07   | 4.17 $\pm$ 2.57   | 0.50 $\pm$ 0.32    | 0.21 $\pm$ 0.15   | 0.00 $\pm$ 0.00   | 0.46 $\pm$ 0.30                    | 0.00 $\pm$ 0.00   | 0.55 $\pm$ 0.55                     | 0.00 $\pm$ 0.00    | 0.44 $\pm$ 0.44                    | 0.00 $\pm$ 0.00   | 0.11 $\pm$ 0.11                    |
| Latency to First Attack                 | 21.71 $\pm$ 6.30  | 65.86 $\pm$ 20.66 | 120.57 $\pm$ 39.36 | 62.00 $\pm$ 27.02 | 34.71 $\pm$ 13.37 | 48.71 $\pm$ 13.57                  | 53.86 $\pm$ 24.14 | 48.75 $\pm$ 27.32                   | 113.14 $\pm$ 39.85 | 46.86 $\pm$ 18.70                  | 56.29 $\pm$ 31.98 | 64.63 $\pm$ 21.18                  |
| Duration of Grooming                    | 7.79 $\pm$ 2.89   | 5.49 $\pm$ 1.63   | 3.94 $\pm$ 1.96    | 6.21 $\pm$ 0.94   | 7.09 $\pm$ 2.65   | 17.94 $\pm$ 10.78                  | 5.01 $\pm$ 0.98   | 12.13 $\pm$ 2.21                    | 5.74 $\pm$ 1.13    | 5.60 $\pm$ 2.57                    | 4.21 $\pm$ 2.02   | 9.88 $\pm$ 1.94                    |
| Frequency of Grooming                   | 5.43 $\pm$ 2.21   | 2.86 $\pm$ 0.77   | 3.57 $\pm$ 1.46    | 3.50 $\pm$ 0.71   | 5.29 $\pm$ 1.43   | 3.57 $\pm$ 1.21                    | 4.00 $\pm$ 0.98   | <b>*9.00 <math>\pm</math> 2.22</b>  | 4.14 $\pm$ 1.14    | 3.14 $\pm$ 1.16                    | 2.43 $\pm$ 0.90   | <b>*7.13 <math>\pm</math> 1.17</b> |
